# Supplementary material for: MnO@graphene nanopeapods derived via a one-pot hydrothermal process for a high performance anode in Li-ion batteries
Source: Royal Society of Chemistry journal article supplement (doi:10.1039/c8nr10294e), 2019-01-01
Supplement: c8nr10294e1.pdf [file c8nr10294e1.pdf]

## Supporting information

### **MnO@graphene nanopeapods derived via a one-pot hydrothermal process for high performance anode in Li-ion batteries**

*Zhihua Xiao<sup>1</sup>, Guoqing Ning<sup>1,\*</sup>, Zhiqing Yu, Chuanlei Qi, Lu Zhao, Yun Li, Xinlong*

*Ma, Yongfeng Li*

State Key Laboratory of Heavy Oil Processing, China University of Petroleum,  
Beijing, Changping 102249, Beijing, China.

<sup>1</sup>These author contributed equally.

\*Corresponding author. E-mail: ngq@cup.edu.cn

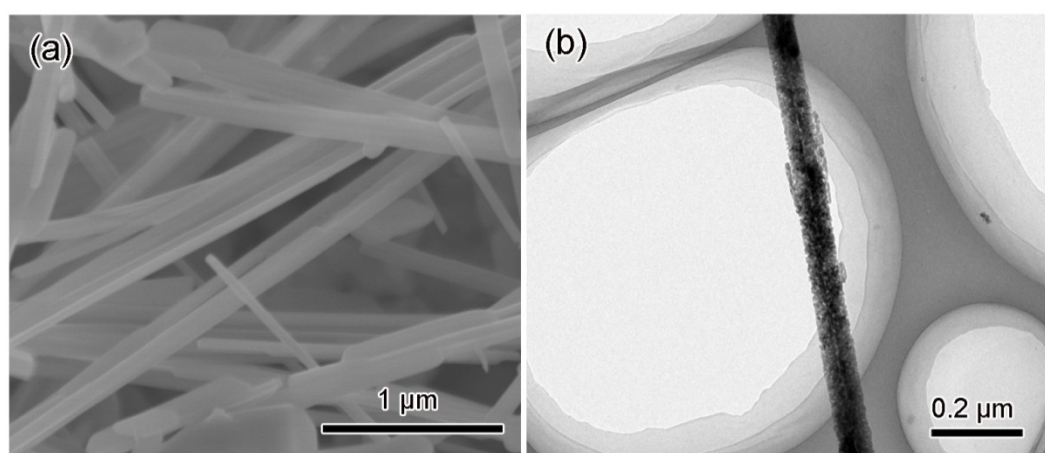

**Figure S1** SEM (a) and TEM (b) images of MnO nano-wires.

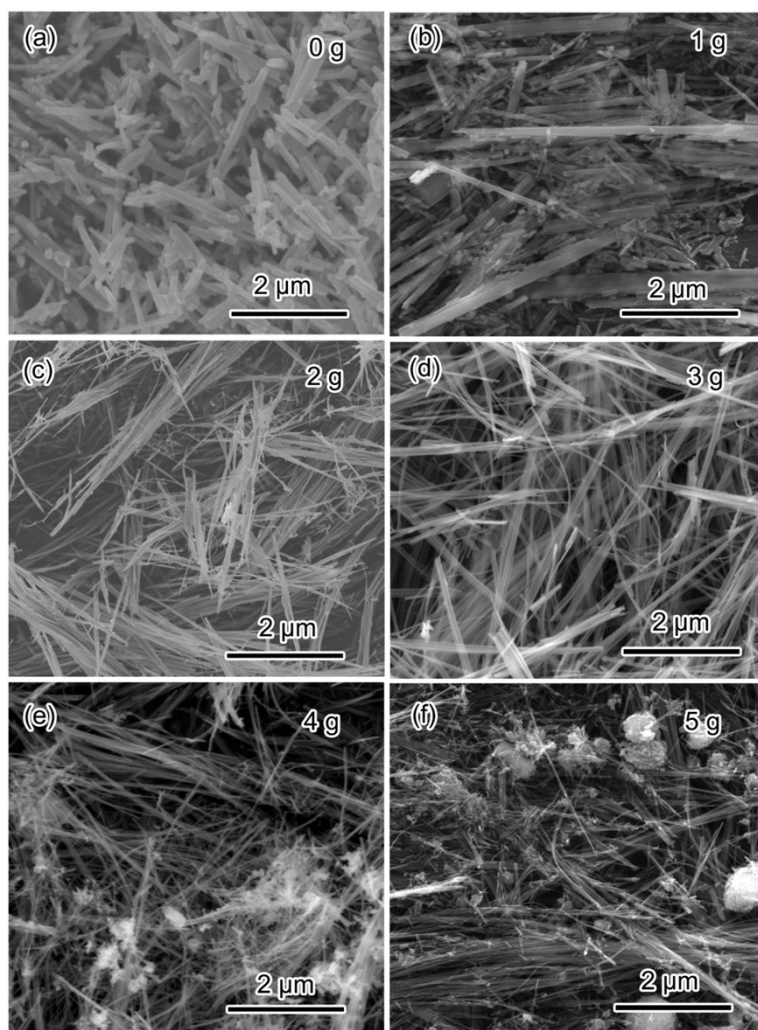

**Figure S2** SEM images of the prepared MnO<sub>2</sub>-C composites by the hydrothermal processes with different amount of SDBS.

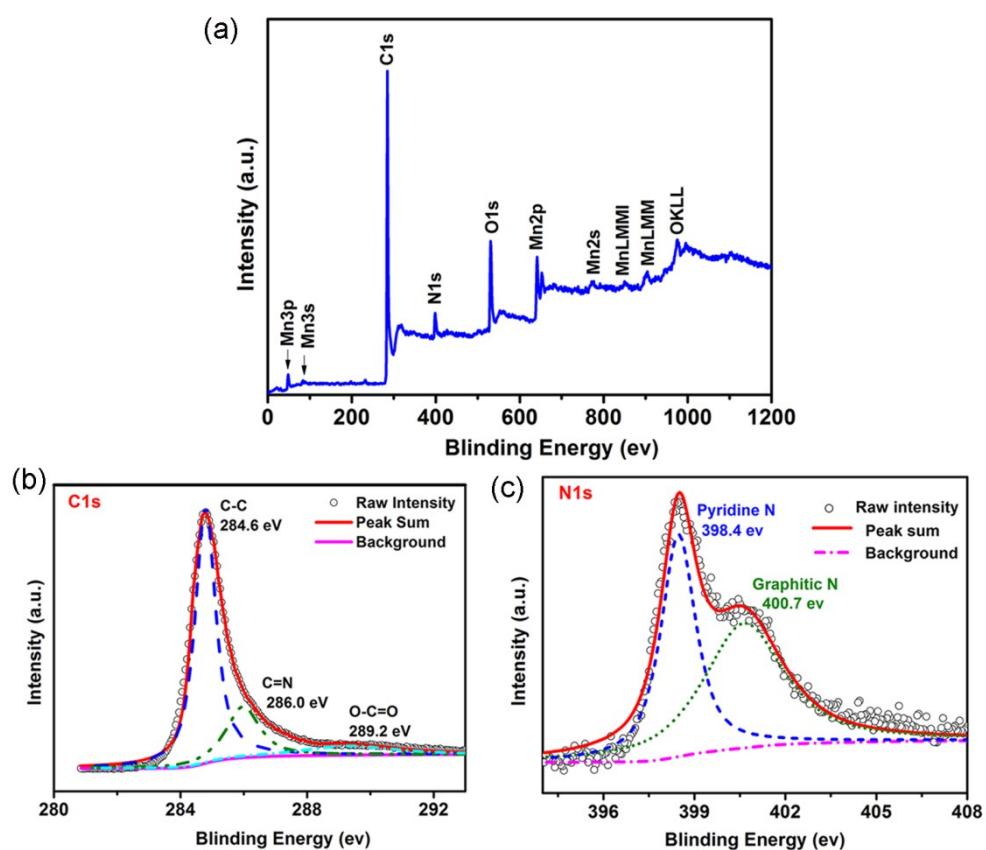

**Figure S3** XPS survey (a), C1s (b) and N1s (c) spectra of NP1200.

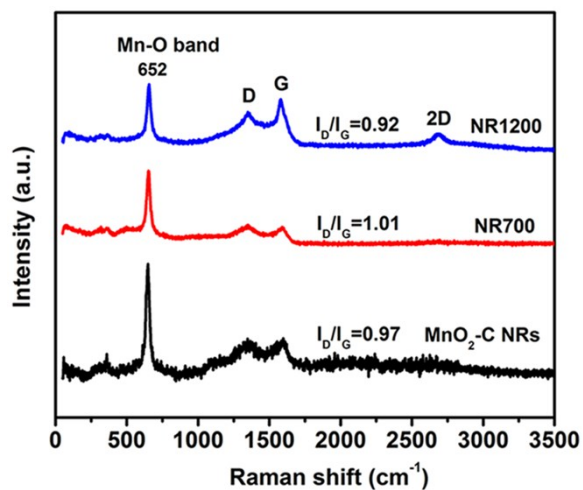

**Figure S4** Raman spectra of MnO<sub>2</sub>-C NRs, NR700 and NR1200.

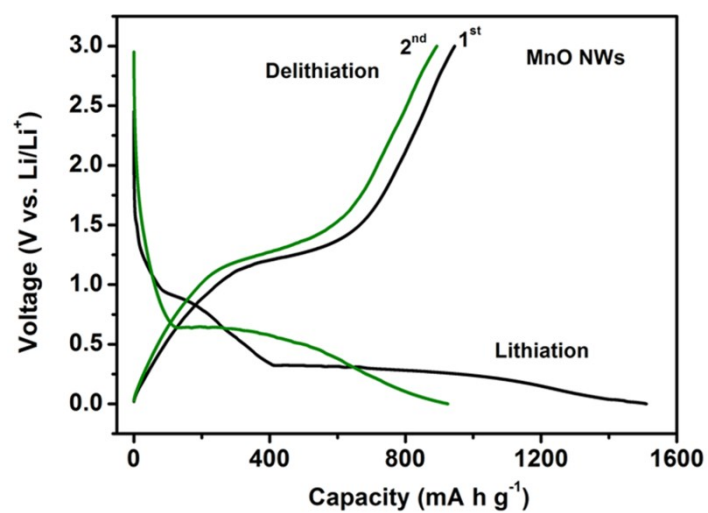

**Figure S5** The first and second discharge/charge curves of MnO NWs.

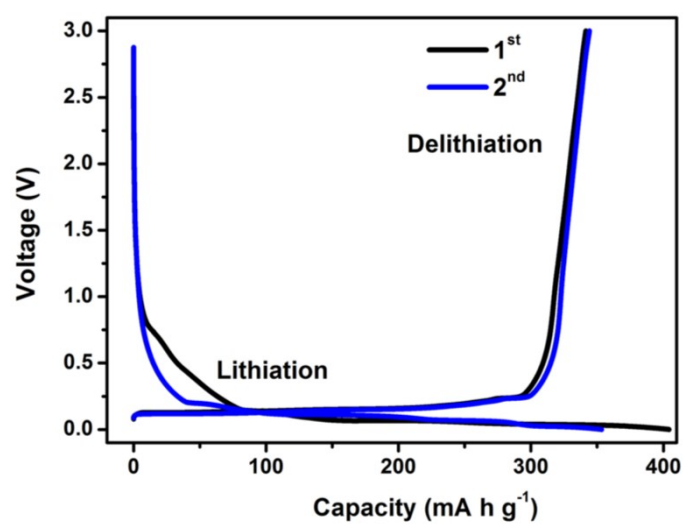

**Figure S6** Typical discharge/charge profiles of the commercial graphite at the current density of 50 mA g<sup>-1</sup>.

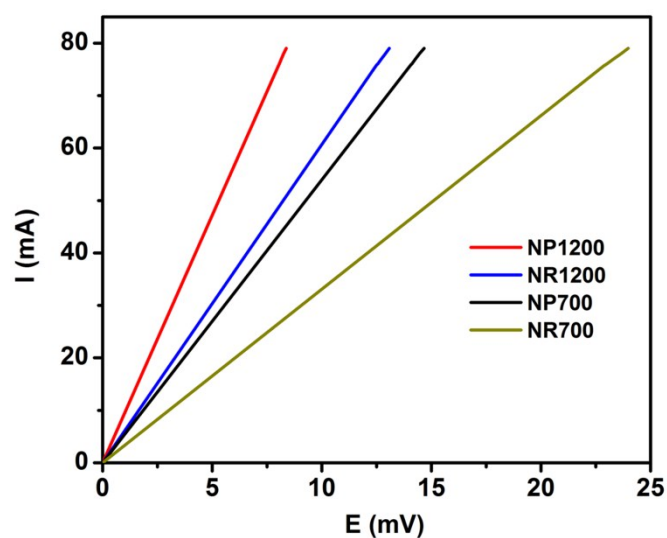

**Figure S7** I-V profiles of NP1200, NR1200, NP700 and NR700.

Table S1 SEI and charge-transfer resistances of NP1200 after 1000 cycles.

| After 1000 cycles | $R_e (\Omega)$ | $R_f (\Omega)$ | $R_{ct} (\Omega)$ |
|-------------------|----------------|----------------|-------------------|
| NR700             | 3.035          | 23.67          | 287               |
| NR1200            | 2.974          | 15.35          | 137.8             |
| NP700             | 2.893          | 17.82          | 144.4             |
| NP1200            | 2.819          | 10.79          | 58.6              |
